# Supplementary material for: On the relations between backbone thiophene functionalization and charge carrier mobility of A–D–A type small molecules
Source: Royal Society of Chemistry journal article supplement (doi:10.1039/d0nj02199g), 2020-01-01
Supplement: d0nj02199g1.pdf [file d0nj02199g1.pdf]

## Supporting Information

### On the relations between backbone thiophene functionalization and charge carrier mobility of A-D-A type of small molecules

Chunlin Xu, Xiaoping Xu and Shaohui Zheng\*

Chongqing Key Laboratory for Advanced Materials and Technologies of Clean Energies

School of Materials and Energy

Southwest University, Chongqing, China

Corresponding author: [shaohuizheng@swu.edu.cn](mailto:shaohuizheng@swu.edu.cn)

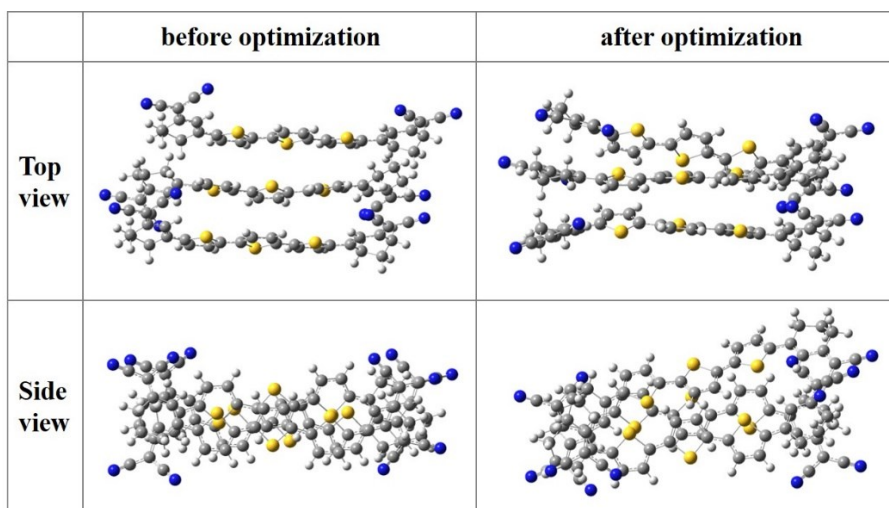

**Figure S1.** Trimer configuration of DCC3T-H based on B3LYP(GD3)/6-31G(d) level of theory.

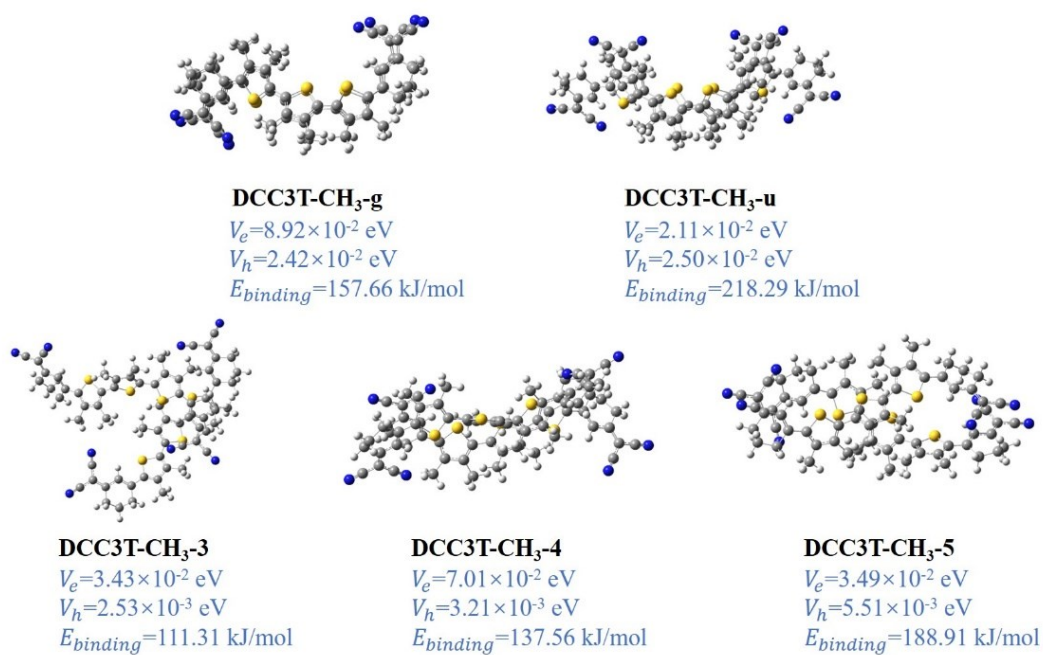

**Figure S2.** Optimized structures of probable dimer configurations of the double substituted DCC3T-CH<sub>3</sub> after geometric optimization, with the electronic coupling for electron transfer ( $V_e$ ) and hole transfer ( $V_h$ ) and the binding energy.

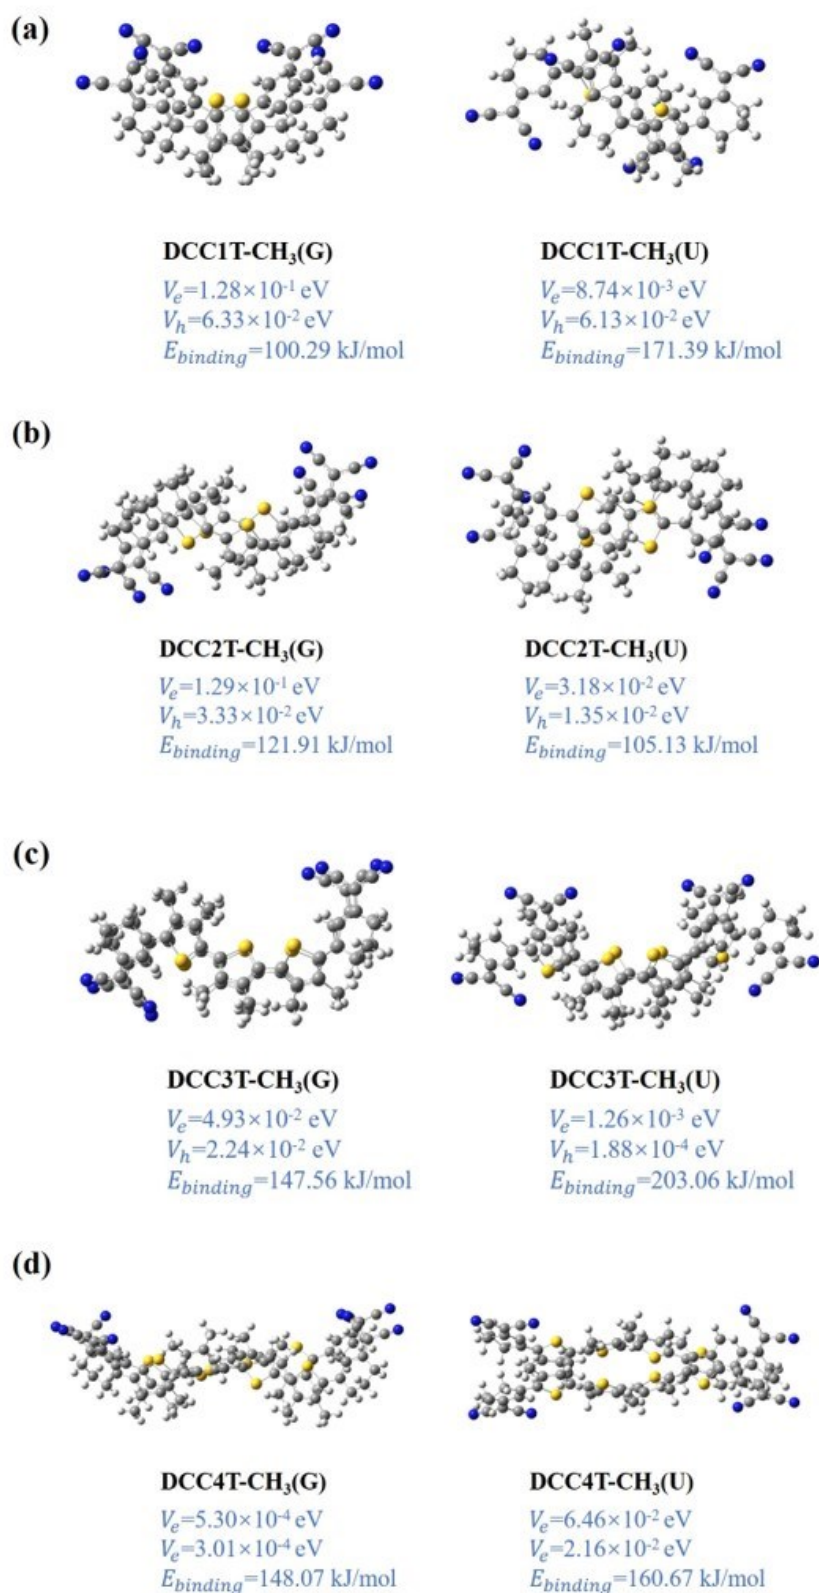

**Figure S3.** Dimer configurations of DCC<sub>n</sub>T-CH<sub>3</sub> (n=1, 2, 3, 4), with the electronic coupling for electron transfer ( $V_e$ ) and hole transfer ( $V_h$ ) and the binding energy. G means parallel packing and U means anti-parallel packing. The binding energy of U configurations are larger than G configurations, except for DCC2T-CH<sub>3</sub>.

| G configurations              | substitution  | Top                                                                                  | Side                                                                                  |
|-------------------------------|---------------|--------------------------------------------------------------------------------------|---------------------------------------------------------------------------------------|
| <b>DCC3T-CH<sub>3</sub></b>   | <i>single</i> | 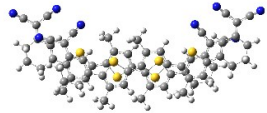    |    |
|                               | <i>double</i> |     |    |
| <b>DCC3T-CHCH<sub>2</sub></b> | <i>single</i> |    |    |
|                               | <i>double</i> |     |    |
| <b>DCC3T-OCH<sub>3</sub></b>  | <i>single</i> |    |   |
|                               | <i>double</i> |   |  |
| <b>DCC3T-OH</b>               | <i>single</i> |  |  |
|                               | <i>double</i> |   |  |
| <b>DCC3T-NH<sub>2</sub></b>   | <i>single</i> |   |  |
|                               | <i>double</i> |   |  |

**Figure S4.** The optimized parallel (G) dimer configurations of DCC3T-X (X= H, CHCH<sub>2</sub>, OCH<sub>3</sub>, OH, NH<sub>2</sub>) based on B3LYP(GD3)/6-31G(d) theory level.

| U configurations              | substitution  | Top                                                                                 | Side                                                                                  |
|-------------------------------|---------------|-------------------------------------------------------------------------------------|---------------------------------------------------------------------------------------|
| <b>DCC3T-CH<sub>3</sub></b>   | <i>single</i> | 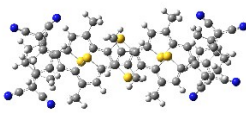   |    |
|                               | <i>double</i> |    |    |
| <b>DCC3T-CHCH<sub>2</sub></b> | <i>single</i> |    |    |
|                               | <i>double</i> |    |    |
| <b>DCC3T-OCH<sub>3</sub></b>  | <i>single</i> |    |    |
|                               | <i>double</i> |   |   |
| <b>DCC3T-OH</b>               | <i>single</i> |  |  |
|                               | <i>double</i> |  |  |
| <b>DCC3T-NH<sub>2</sub></b>   | <i>single</i> |  |  |
|                               | <i>double</i> |  |  |

**Figure S5.** The optimized parallel (G) dimer configurations of DCC3T-X (X= H, CHCH<sub>2</sub>, OCH<sub>3</sub>, OH, NH<sub>2</sub>) based on B3LYP(GD3)/6-31G(d) theory level.

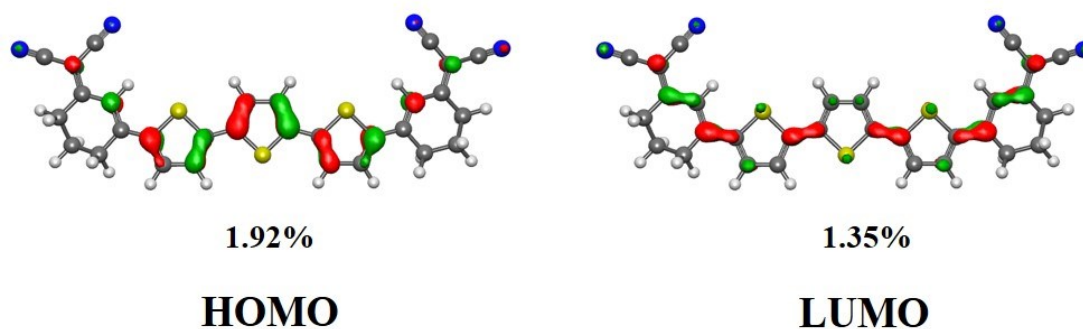

**Figure S6.** HOMO and LUMO orbitals of DCC3T-H with the contributions (listed percentage) of functionalized groups based on CAM-B3LYP/6-31G(d) level of theory. Isosurface=0.05.

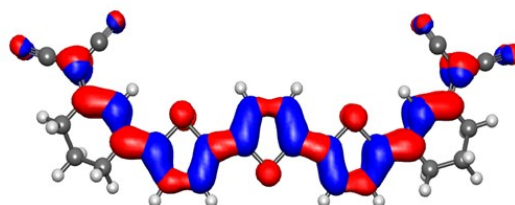

**DCC3T-H**

H→L=87.2 %;  
E-E<sub>0</sub>=2.53 eV; q<sub>CT</sub>=0.46

**Figure S7.** The CDD maps of the first singlet excited state of DCC3T-H based on TDDFT/CAM-B3LYP/6-31G(d) .Isosurface=0.001, H→L: percentage of the HOMO→LUMO transition; E-E<sub>0</sub>: excitation energy; q<sub>CT</sub>: the amount of transferred charge in unit of elementary charge. Color of codes: red-electron; blue-hole.



The results of geometry, FMOs and the first excited state of DCC3T-C<sub>6</sub>H<sub>13</sub> are close to those of DCC3T-CH<sub>3</sub>, indicating the long alkyl sidechain does little effect on the properties of monomer.

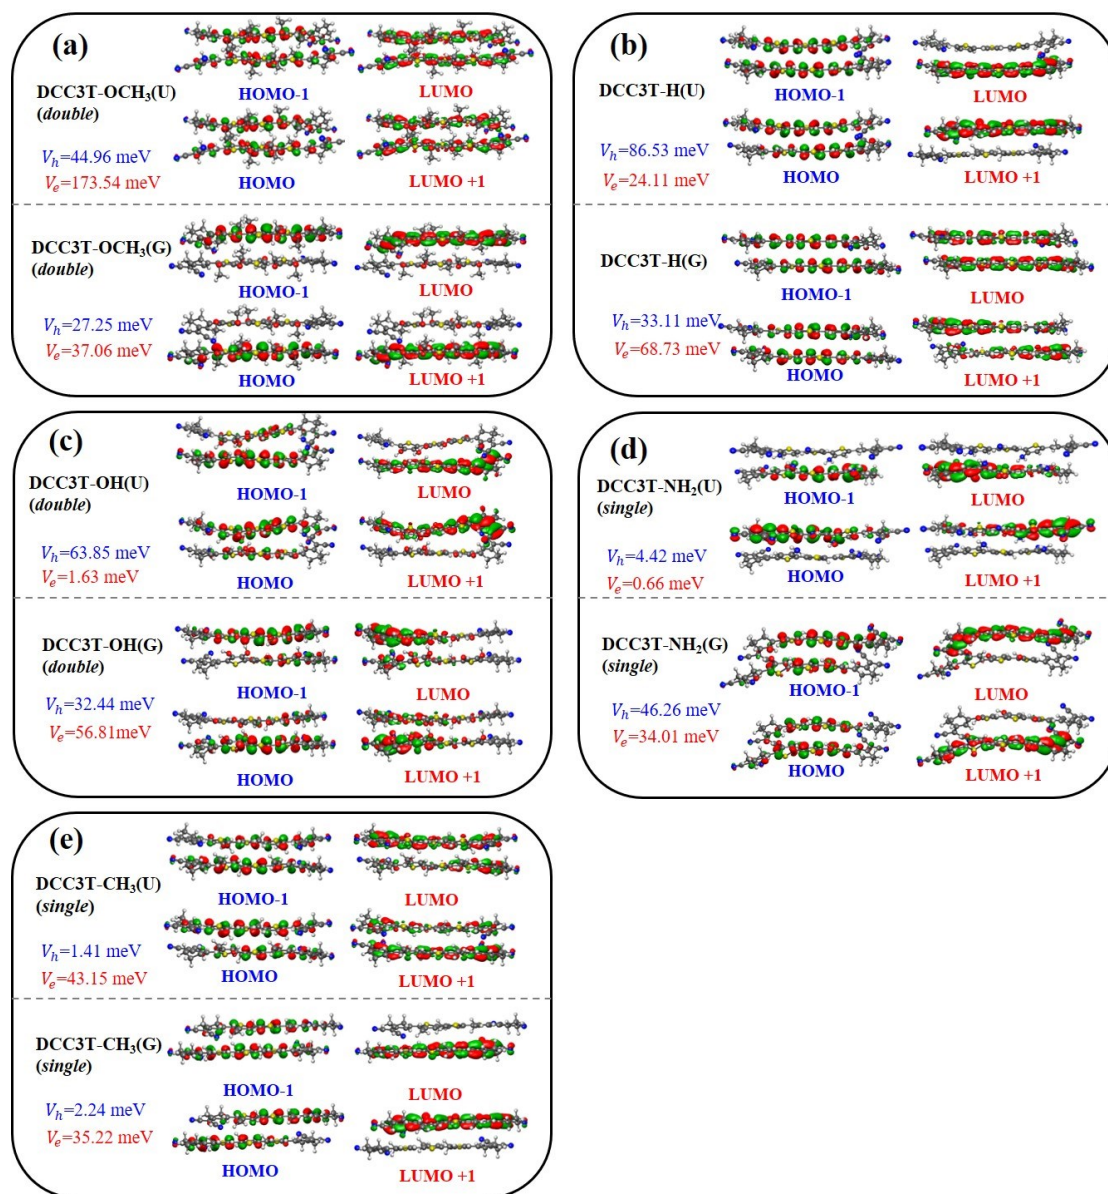

**Figure S10.** FMOs DCC3T-X dimers based on CAM-B3LYP/6-31G(d) theory level, with the calculated overlap integral ( $S_{if}$ ) and electronic coupling ( $V_{e,h}$ ). For clarity, the Isosurface value is set to 0.03. a: double substituted DCC3T-OCH<sub>3</sub>; b: DCC3T-H; c: double substituted DCC3T-OH(U); d: single substituted DCC3T-NH<sub>2</sub>; e: single substituted DCC3T-CH<sub>3</sub>.

For single substituted DCC3T-NH<sub>2</sub>, the FMOs are delocalized on single molecule, besides, the HOMO(LUMO+1) and HOMO-1(LUMO) are distributed on opposite sides, thus, the orbital overlap and electronic coupling are extremely small. For the



double substituted DCC3T-OCH<sub>3</sub>(U), the FMOs are separated on two molecules with high symmetry, thus, the orbital overlap and electronic coupling are extremely large.

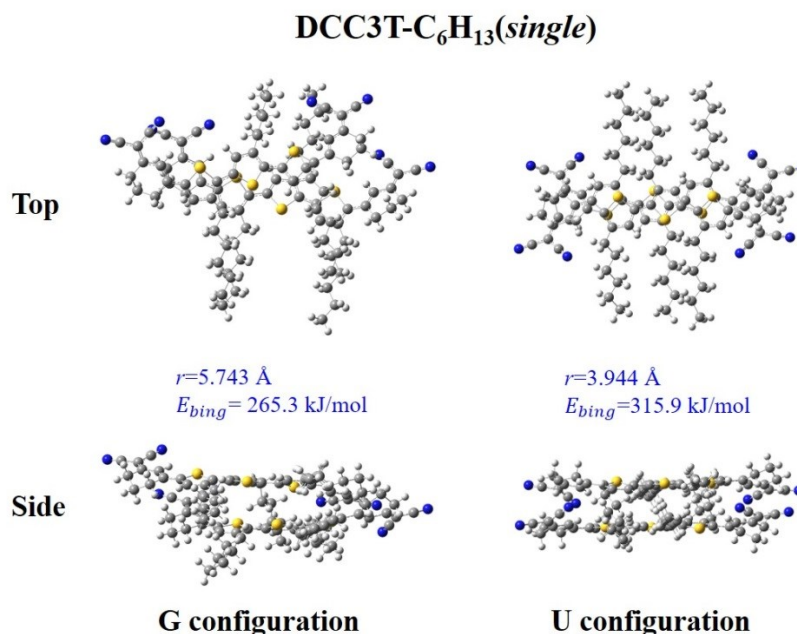

**Figure S11.** The optimized dimer structure of the single substituted DCC3T-C<sub>6</sub>H<sub>13</sub>, based on B3LYP(GD3)/6-31G(d) theory level. The geometry center distance ( $r$ ) and binding energy ( $E_{binding}$ ) are also listed. The results suggest U configuration is much stabler than G configuration in terms of binding energy, and the  $\pi$ - $\pi$  stacking of U configuration is much stronger than G configuration due to smaller distance and better fitted molecular packing.

**Table S1.** Charge transfer distance ( $r$ , in Å), absolute value of electronic coupling ( $|V_{e,h}|$  in meV), charge transfer rate constant ( $k_{e,h}$ , in s<sup>-1</sup>), inner reorganization energy (in eV) of electron transfer ( $\lambda_e$ ) and hole transfer ( $\lambda_h$ ), and charge carrier mobility ( $\mu_{e,h}$ , in cm<sup>2</sup>V<sup>-1</sup>s<sup>-1</sup>) of dimers of the single substituted DCC3T-C<sub>6</sub>H<sub>13</sub> and DCC3T-CH<sub>3</sub>.

| Molecule                                 |               | $r$   | Electron transport |             |                       |                       | Hole transport |             |                       |                       |
|------------------------------------------|---------------|-------|--------------------|-------------|-----------------------|-----------------------|----------------|-------------|-----------------------|-----------------------|
|                                          |               |       | $ V_e $            | $\lambda_e$ | $k_e$                 | $\mu_e$               | $ V_h $        | $\lambda_h$ | $k_h$                 | $\mu_h$               |
| DCC3T-C <sub>6</sub> H <sub>13</sub> (U) | <i>single</i> | 3.944 | 14.83              | 0.31        | $3.43 \times 10^{11}$ | $2.20 \times 10^{-2}$ | 26.64          | 0.18        | $5.03 \times 10^{12}$ | $3.23 \times 10^{-1}$ |
| DCC3T-C <sub>6</sub> H <sub>13</sub> (G) | <i>single</i> | 5.743 | 11.52              | 0.31        | $2.07 \times 10^{11}$ | $1.33 \times 10^{-2}$ | 15.52          | 0.18        | $1.71 \times 10^{12}$ | $1.10 \times 10^{-1}$ |
| DCC3T-CH <sub>3</sub> (U)                | <i>single</i> | 3.638 | 43.15              | 0.32        | $2.58 \times 10^{12}$ | $6.62 \times 10^{-2}$ | 1.41           | 0.19        | $1.28 \times 10^{10}$ | $3.29 \times 10^{-4}$ |
| DCC3T-CH <sub>3</sub> (G)                | <i>single</i> | 4.713 | 35.22              | 0.32        | $1.72 \times 10^{12}$ | $7.44 \times 10^{-2}$ | 2.44           | 0.19        | $3.82 \times 10^{10}$ | $1.65 \times 10^{-3}$ |

The electron mobility of DCC3T-C<sub>6</sub>H<sub>13</sub> are slightly smaller than DCC3T-CH<sub>3</sub>, while the hole mobility of DCC3T-C<sub>6</sub>H<sub>13</sub> are about one hundred times of DCC3T-CH<sub>3</sub>. The

differences between DCC3T-CH<sub>3</sub> and DCC3T-C<sub>6</sub>H<sub>13</sub> can mainly attribute to the molecular packing. In DCC3T-CH<sub>3</sub> dimer, the  $\pi$ - $\pi$  stacking between the A-D-A backbones of two molecules are much weaker than DCC3T-C<sub>6</sub>H<sub>13</sub>, as shown in Figure S3-4 and Figure S10. The results indicate the presence of alkyl side chain does good to the molecular packing and charge mobility.
